# Supplementary material for: Immunologic alterations in the pancreatic cancer microenvironment of patients treated with neoadjuvant chemotherapy and radiotherapy
Source: JCI journal article supplement (doi:10.1172/jci.insight.130362), 2019-12-12
Supplement: sd1 [file 1]

**Supplemental Figure 1. Selection of tumor-rich, immune cell-rich, and stroma-rich regions within PDAC tumors.** (a) As part of the GeoMX workflow, FFPE slides of PDAC tumors from patients who received upfront surgical resection (*top*) or surgical resection following neoadjuvant therapy with either FOLFIRINOX alone (*middle*) or FOLFIRINOX + SBRT (*bottom*) were stained with fluorescently labeled anti-pan-cytokeratin (green), anti-CD45 (red), and anti- $\alpha$ -smooth muscle actin ( $\alpha$ SMA, blue). These fluorescently labeled antibodies were used to manually define regions of interest with the intent being to select “tumor-rich regions” (rich in pan-cytokeratin staining but largely lacking CD45 and  $\alpha$ SMA staining), “immune cell-rich regions” (rich in CD45 staining but largely lacking pan-cytokeratin and  $\alpha$ SMA staining), and stroma-rich regions (rich in  $\alpha$ SMA but largely lacking the other two markers). The white bar denotes 1mm.

**Supplemental Figure 2. Networks of up and down regulated genes: F+SBRT vs. Surgery-alone.** Interaction map of significantly differentially expressed genes when comparing F+SBRT treated patient tumors with those who received surgery-alone. Interaction map was generated with protein-protein interaction enrichment analysis and the Molecular Complex Detection (MCODE) algorithm, using the list of genes identified in figure 1.d. (a) Interaction map of genes with lower expression in F+SBRT treated patient tumors, compared to surgery alone. (b) Interaction map of genes with higher expression in F+SBRT treated patient tumors, compared to surgery alone.

**Supplemental Figure 3. Networks of up and down regulated genes: F+XRT vs. Surgery-alone.** Interaction map of significantly differentially expressed genes when comparing F+SBRT treated patient tumors with those who received surgery-alone. Interaction map was generated with protein-protein interaction enrichment analysis and the Molecular Complex Detection (MCODE) algorithm, using the list of genes identified in figure 1.e. (a) Interaction map of genes with lower expression in F+XRT treated patient tumors, compared to surgery alone. (b) Interaction map of genes with higher expression in F+XRT treated patient tumors, compared to surgery alone.

**Supplemental Figure 4. Networks of up and down regulated genes: F+SBRT vs. FOLFIRINOX.** Interaction map of significantly differentially expressed genes when comparing F+SBRT treated patient tumors with those who received FOLFIRINOX. Interaction map was generated with protein-protein interaction enrichment analysis and the Molecular Complex Detection (MCODE) algorithm, using the list of genes identified in figure 1.e. (a) Interaction map of genes with lower expression in F+SBRT treated patient tumors, compared to FOLFIRINOX. (b) Interaction map of genes with higher expression in F+SBRT treated patient tumors, compared to FOLFIRINOX.

**Supplemental Figure 5. Networks of up and down regulated genes: F+XRT vs. FOLFIRINOX.** Interaction map of significantly differentially expressed genes when comparing F+SRT treated patient tumors with those who received FOLFIRINOX. Interaction map was generated with protein-protein interaction enrichment analysis and the Molecular Complex Detection (MCODE) algorithm, using the list of genes identified in figure 1.e. (a) Interaction map of genes with lower expression in F+XRT treated patient tumors, compared to

FOLFIRINOX. (b) Interaction map of genes with higher expression in F+XRT treated patient tumors, compared to FOLFIRINOX.

Supplemental Table 1. Antibodies used in GeoMX analysis

| <b>Target</b>               | <b>Conjugate ID (Nanostring)</b> |
|-----------------------------|----------------------------------|
| AKT                         | CAB-962                          |
| B7-H3                       | CAB-959                          |
| BCL-2                       | CAB-960                          |
| $\beta$ -2-Microglobulin    | CAB-964                          |
| $\beta$ -Catenin            | CAB-963                          |
| CD14                        | CAB-397                          |
| CD19                        | CAB-993                          |
| CD3                         | CAB-1019                         |
| CD4                         | CAB-941                          |
| CD44                        | CAB-619                          |
| CD45                        | CAB-1018                         |
| CD45RO                      | CAB-389                          |
| CD56                        | CAB-1020                         |
| CD68                        | CAB-1023                         |
| CD8A                        | CAB-1022                         |
| FOXP3                       | CAB-840                          |
| Granzyme B                  | CAB-1044                         |
| Histone H3                  | CAB-498                          |
| Ki-67 (8D5)                 | CAB-689                          |
| Mouse IgG2a Isotype Control | CAB-891                          |
| MS4A1 (CD20)                | CAB-943                          |
| Phospho-AKT                 | CAB-834                          |
| Pan-cytokeratin             | CAB-886                          |
| PD-L1                       | CAB-833                          |
| PD-1                        | CAB-1024                         |
| PTEN                        | CAB-998                          |
| Rabbit IgG Isotype Control  | CAB-836                          |
| S6                          | CAB-837                          |
| STAT3                       | CAB-957                          |
| Phospho-STAT3 (Y705)        | CAB-958                          |
| VISTA                       | CAB-940                          |

Supplemental Table 2. Differentially expressed genes.

| <b>DEGs shared by: FS vs. C, FS vs. F, FX vs. C, FX vs. F (26 genes)</b> |        |       |      |        |       |        |         |
|--------------------------------------------------------------------------|--------|-------|------|--------|-------|--------|---------|
| ATG7                                                                     | ATM    | CD164 | CD47 | CDKN1A | FAS   | GAGE1  | IKBKG   |
| IL1A                                                                     | IL25   | IRF3  | IRF5 | ITCH   | LAMP2 | LILRB2 | LILRB3  |
| NOD2                                                                     | NOTCH1 | PSMB7 | RELA | S100A7 | SBNO2 | TLR7   | TNFRSF8 |
| TPTE                                                                     | YTHDF2 |       |      |        |       |        |         |

| <b>DEGs shared by: FS vs. C, FS vs. F, FX vs. C (4 genes)</b> |        |        |      |
|---------------------------------------------------------------|--------|--------|------|
| CD55                                                          | FLT3LG | ITGA2B | TFE3 |

| <b>DEGs shared by: FS vs C, FX vs C, FX vs F (10 genes)</b> |         |       |      |       |     |      |      |
|-------------------------------------------------------------|---------|-------|------|-------|-----|------|------|
| CD274                                                       | CEACAM8 | IFNA7 | IFNG | IL12B | IL5 | JAK2 | RAG1 |
| SPANXB1                                                     | TNFAIP3 |       |      |       |     |      |      |

| <b>DEGs shared by: FS vs. C, FS vs. F, FX vs. F (2 genes)</b> |       |
|---------------------------------------------------------------|-------|
| FEZ1                                                          | SPA17 |

| <b>DEGs shared by: FS vs. F, FX vs. C, FX vs. F (3 genes)</b> |         |       |
|---------------------------------------------------------------|---------|-------|
| CLEC7A                                                        | KIR3DL1 | PSEN2 |

| <b>DEGs shared by: FS vs. C, FX vs. C (61 genes)</b> |         |                           |          |        |        |        |         |
|------------------------------------------------------|---------|---------------------------|----------|--------|--------|--------|---------|
| ABL1                                                 | ARG1    | C8A                       | C9       | CASP10 | CCL1   | CCL16  | CCR3    |
| CCR9                                                 | CD160   | CD1E                      | CD207    | CD8B   | CLEC6A | CLU    | COLEC12 |
| CD45A1                                               | CTAGE1  | CTCFL                     | ELK1     | FCGR1A | IFNA8  | IFNA17 | IFNB1   |
| IFNL2                                                | IL12RB1 | IL18RAP                   | IL1RAPL2 | IL21   | IL22   | IL24   | IL26    |
| IL5RA                                                | ITGB1   | KIR Activating Subgroup 2 |          |        | KLRC2  | LILRA1 | LRRN3   |
| MAGEA1                                               | MAGEA3  | MAGEB2                    | MAGEC3   | MPPED1 | NLRC5  | PIN1   | PRAME   |
| PRM1                                                 | REPS1   | SELE                      | SH2D1B   | SMAD2  | SSX1   | SSX4   | SYCP1   |
| TANK                                                 | TAPBP   | TMEFF2                    | ULBP2    | XCL2   | XCR1   | ZNF205 |         |

| <b>DEGs shared by: FS vs. C, FS vs. F (5 genes)</b> |     |       |        |       |
|-----------------------------------------------------|-----|-------|--------|-------|
| AIRE                                                | BAX | CASP3 | IL11RA | SMAD3 |

| <b>DEGs shared by: FX vs. C, FX vs. F (8 genes)</b> |    |       |      |          |       |       |       |
|-----------------------------------------------------|----|-------|------|----------|-------|-------|-------|
| BST2                                                | C2 | CCRL2 | CD80 | HLA-DRB3 | LAIR2 | NLRP3 | SEMG1 |

| <b>DEGs shared by FS vs. F, FX vs. F (7 genes)</b> |       |      |        |     |       |      |
|----------------------------------------------------|-------|------|--------|-----|-------|------|
| BID                                                | CARD9 | CD14 | CX3CR1 | IL7 | MYD88 | NRP1 |

| <b>DEGs unique to FS vs. C (24 genes)</b> |      |        |       |           |         |        |         |
|-------------------------------------------|------|--------|-------|-----------|---------|--------|---------|
| CD58                                      | CD70 | CFD    | FADD  | HLA-G     | ICAM4   | ICOSLG | IL3     |
| IL3RA                                     | IRGM | MAP2K4 | NCAM1 | NFKB1     | PRG2    | RRAD   | S100A12 |
| SIGIRR                                    | SYK  | TAP2   | TFEB  | TNFRSF10C | TNFSF13 | TP53   | TRAF6   |

| <b>DEGs unique to FX vs. C (9 genes)</b> |      |      |      |       |         |       |      |       |
|------------------------------------------|------|------|------|-------|---------|-------|------|-------|
| CCL14                                    | CCR5 | CD8A | IDO1 | IFNA1 | IL13RA2 | IL23R | MEFV | ROPN1 |

| <b>DEGs unique to FS vs. F (3 genes)</b> |        |      |  |
|------------------------------------------|--------|------|--|
| LTA                                      | MAP3K5 | NOD1 |  |

| <b>DEGs unique to FX vs. F (27 genes)</b> |       |       |       |       |       |         |       |      |
|-------------------------------------------|-------|-------|-------|-------|-------|---------|-------|------|
| BIRC5                                     | C4BPA | CCL26 | CD44  | CD84  | CXCL1 | CYBB    | ECSIT | HCK  |
| IFIH1                                     | IFIT1 | IFIT2 | IL17F | IL1B  | IL1RN | ISG15   | JAK3  | LBP  |
| LTB                                       | MICB  | NCF4  | OAS3  | PLAUR | RORC  | SIGLEC1 | TLR1  | TLR4 |

Supplemental table 3. Top-ranked enriched gene sets based on up- and downregulated genes

| <b>F+SBRT vs. surgery-alone downregulated genes (22 genes)</b> |                         |                |                    |
|----------------------------------------------------------------|-------------------------|----------------|--------------------|
| <b>Gene Set Name</b>                                           | <b>Genes in Overlap</b> | <b>p-value</b> | <b>FDR q-value</b> |
| GO IMMUNE SYSTEM PROCESS                                       | 15                      | 4.10E-16       | 7.31E-12           |
| REACTOME IMMUNE SYSTEM                                         | 11                      | 1.31E-13       | 1.17E-09           |
| GO REGULATION OF IMMUNE SYSTEM PROCESS                         | 10                      | 3.15E-10       | 1.42E-06           |
| GO POSITIVE REGULATION OF RESPONSE TO STIMULUS                 | 11                      | 3.19E-10       | 1.42E-06           |
| GO RECEPTOR BINDING                                            | 10                      | 5.15E-10       | 1.84E-06           |
| GO IMMUNE RESPONSE                                             | 9                       | 9.39E-10       | 2.79E-06           |
| GO POSITIVE REGULATION OF IMMUNE SYSTEM PROCESS                | 8                       | 3.93E-09       | 1.00E-05           |
| GO REGULATION OF CYTOKINE PRODUCTION                           | 7                       | 5.80E-09       | 1.29E-05           |
| GO REGULATION OF CELL ADHESION                                 | 7                       | 1.24E-08       | 2.14E-05           |
| GO POSITIVE REGULATION OF PROTEIN METABOLIC PROCESS            | 9                       | 1.33E-08       | 2.14E-05           |

| <b>F+SBRT vs. surgery-alone upregulated genes (110 genes)</b> |                         |                |                    |
|---------------------------------------------------------------|-------------------------|----------------|--------------------|
| <b>Gene Set Name</b>                                          | <b>Genes in Overlap</b> | <b>p-value</b> | <b>FDR q-value</b> |
| GO IMMUNE RESPONSE                                            | 67                      | 5.64E-81       | 1.01E-76           |
| GO IMMUNE SYSTEM PROCESS                                      | 75                      | 5.52E-77       | 4.92E-73           |
| GO DEFENSE RESPONSE                                           | 60                      | 1.97E-65       | 1.17E-61           |
| GO REGULATION OF IMMUNE SYSTEM PROCESS                        | 51                      | 4.64E-48       | 2.06E-44           |
| KEGG CYTOKINE CYTOKINE RECEPTOR INTERACTION                   | 30                      | 3.39E-42       | 1.21E-38           |
| GO RESPONSE TO CYTOKINE                                       | 38                      | 3.52E-41       | 1.04E-37           |
| GO CELLULAR RESPONSE TO CYTOKINE STIMULUS                     | 36                      | 1.21E-40       | 3.09E-37           |
| REACTOME IMMUNE SYSTEM                                        | 40                      | 9.96E-40       | 2.22E-36           |
| GO INNATE IMMUNE RESPONSE                                     | 34                      | 3.76E-37       | 7.45E-34           |
| GO CELLULAR RESPONSE TO ORGANIC SUBSTANCE                     | 47                      | 7.83E-37       | 1.37E-33           |

| <b>F+XRT vs. surgery-alone downregulated genes (16 genes)</b> |                         |                |                    |
|---------------------------------------------------------------|-------------------------|----------------|--------------------|
| <b>Gene Set Name</b>                                          | <b>Genes in Overlap</b> | <b>p-value</b> | <b>FDR q-value</b> |
| GO IMMUNE SYSTEM PROCESS                                      | 11                      | 3.38E-12       | 6.02E-08           |
| GO POSITIVE REGULATION OF RESPONSE TO STIMULUS                | 10                      | 1.05E-10       | 9.39E-07           |
| GO POSITIVE REGULATION OF DEFENSE RESPONSE                    | 6                       | 1.77E-09       | 1.05E-05           |
| GO REGULATION OF DEFENSE RESPONSE                             | 6                       | 1.38E-07       | 6.16E-04           |
| GO REGULATION OF RESPONSE TO STRESS                           | 7                       | 2.97E-07       | 8.63E-04           |
| GO POSITIVE REGULATION OF PROTEIN METABOLIC PROCESS           | 7                       | 3.32E-07       | 8.63E-04           |
| GO NEGATIVE REGULATION OF TYPE I INTERFERON PRODUCTION        | 3                       | 3.39E-07       | 8.63E-04           |
| GO POSITIVE REGULATION OF CELL COMMUNICATION                  | 7                       | 3.96E-07       | 8.82E-04           |
| REACTOME IMMUNE SYSTEM                                        | 6                       | 4.64E-07       | 9.18E-04           |
| GO IMMUNE RESPONSE                                            | 6                       | 1.21E-06       | 2.15E-03           |

Supplemental table 3 (cont.)

| <b>F+XRT vs. surgery-alone upregulated genes (105 genes)</b> |                         |                |                    |
|--------------------------------------------------------------|-------------------------|----------------|--------------------|
| <b>Gene Set Name</b>                                         | <b>Genes in Overlap</b> | <b>p-value</b> | <b>FDR q-value</b> |
| GO IMMUNE RESPONSE                                           | 64                      | 1.81E-77       | 3.21E-73           |
| GO DEFENSE RESPONSE                                          | 65                      | 4.05E-76       | 2.77E-72           |
| GO IMMUNE SYSTEM PROCESS                                     | 73                      | 4.67E-76       | 2.77E-72           |
| GO REGULATION OF IMMUNE SYSTEM PROCESS                       | 53                      | 1.64E-52       | 7.31E-49           |
| GO REGULATION OF IMMUNE RESPONSE                             | 41                      | 9.81E-44       | 3.49E-40           |
| GO INNATE IMMUNE RESPONSE                                    | 37                      | 7.81E-43       | 2.32E-39           |
| GO RESPONSE TO EXTERNAL STIMULUS                             | 50                      | 2.18E-42       | 5.53E-39           |
| GO RESPONSE TO CYTOKINE                                      | 38                      | 4.00E-42       | 8.91E-39           |
| GO RESPONSE TO BIOTIC STIMULUS                               | 40                      | 1.28E-41       | 2.54E-38           |
| GO CELLULAR RESPONSE TO CYTOKINE STIMULUS                    | 35                      | 6.73E-40       | 1.20E-36           |

| <b>F+SBRT vs. FOLFIRINOX downregulated genes (10 genes)</b> |                         |                |                    |
|-------------------------------------------------------------|-------------------------|----------------|--------------------|
| <b>Gene Set Name</b>                                        | <b>Genes in Overlap</b> | <b>p-value</b> | <b>FDR q-value</b> |
| GO IMMUNE SYSTEM PROCESS                                    | 8                       | 4.96E-10       | 8.83E-06           |
| ABRAHAM ALPC VS MULTIPLE MYELOMA DN                         | 3                       | 7.18E-09       | 6.39E-05           |
| GAVIN FOXP3 TARGETS CLUSTER P3                              | 4                       | 2.92E-08       | 1.74E-04           |
| GO REGULATION OF RESPONSE TO STRESS                         | 6                       | 1.98E-07       | 6.75E-04           |
| GO POSITIVE REGULATION OF PROTEIN METABOLIC PROCESS         | 6                       | 2.18E-07       | 6.75E-04           |
| BIOCARTA HIVNEF PATHWAY                                     | 3                       | 2.27E-07       | 6.75E-04           |
| RUTELLA RESPONSE TO CSF2RB AND IL4 UP                       | 4                       | 5.83E-07       | 1.48E-03           |
| PILON KLF1 TARGETS DN                                       | 6                       | 1.12E-06       | 2.50E-03           |
| RUTELLA RESPONSE TO HGF UP                                  | 4                       | 1.36E-06       | 2.69E-03           |
| TGCACTT MIR519C MIR519B MIR519A                             | 4                       | 1.79E-06       | 3.18E-03           |

| <b>F+SBRT vs. FOLFIRINOX upregulated genes (40 genes)</b>  |                         |                |                    |
|------------------------------------------------------------|-------------------------|----------------|--------------------|
| <b>Gene Set Name</b>                                       | <b>Genes in Overlap</b> | <b>p-value</b> | <b>FDR q-value</b> |
| GO IMMUNE SYSTEM PROCESS                                   | 31                      | 7.34E-35       | 9.99E-31           |
| GO IMMUNE RESPONSE                                         | 27                      | 1.12E-34       | 9.99E-31           |
| GO REGULATION OF IMMUNE SYSTEM PROCESS                     | 26                      | 4.92E-30       | 2.92E-26           |
| GO DEFENSE RESPONSE                                        | 24                      | 6.24E-28       | 2.78E-24           |
| GO RESPONSE TO BIOTIC STIMULUS                             | 21                      | 7.14E-26       | 2.54E-22           |
| GO RESPONSE TO EXTERNAL STIMULUS                           | 24                      | 6.61E-24       | 1.96E-20           |
| GO POSITIVE REGULATION OF IMMUNE SYSTEM PROCESS            | 19                      | 1.29E-22       | 3.28E-19           |
| GO POSITIVE REGULATION OF MULTICELLULAR ORGANISMAL PROCESS | 21                      | 8.76E-22       | 1.95E-18           |
| GO REGULATION OF CELL DEATH                                | 21                      | 2.64E-21       | 5.23E-18           |
| GO RESPONSE TO BACTERIUM                                   | 16                      | 3.59E-21       | 6.39E-18           |

Supplemental table 3 (cont.)

| <b>F+XRT vs. FOLFIRINOX downregulated genes (10 genes)</b> |                         |                |                    |
|------------------------------------------------------------|-------------------------|----------------|--------------------|
| <b>Gene Set Name</b>                                       | <b>Genes in Overlap</b> | <b>p-value</b> | <b>FDR q-value</b> |
| GO IMMUNE SYSTEM PROCESS                                   | 8                       | 4.96E-10       | 8.83E-06           |
| GO IMMUNE RESPONSE                                         | 5                       | 1.78E-06       | 1.46E-02           |
| GO IMMUNE EFFECTOR PROCESS                                 | 4                       | 2.47E-06       | 1.46E-02           |
| GSE14415 NATURAL TREG VS TCONV UP                          | 3                       | 4.02E-06       | 1.70E-02           |
| GAVIN FOXP3 TARGETS CLUSTER P3                             | 3                       | 4.88E-06       | 1.70E-02           |
| UEDA PERIFERAL CLOCK                                       | 3                       | 5.75E-06       | 1.70E-02           |
| ABRAHAM ALPC VS MULTIPLE MYELOMA DN                        | 2                       | 7.27E-06       | 1.70E-02           |
| GSE19401 UNSTIM VS PAM2CSK4 STIM FOLLICULAR DC DN          | 3                       | 9.53E-06       | 1.70E-02           |
| GSE22886 NAIVE TCELL VS DC DN                              | 3                       | 9.53E-06       | 1.70E-02           |
| GSE37301 LYMPHOID PRIMED MPP VS PRO BCELL UP               | 3                       | 9.53E-06       | 1.70E-02           |

| <b>F+XRT vs. FOLFIRINOX upregulated genes (73 genes)</b> |                         |                |                    |
|----------------------------------------------------------|-------------------------|----------------|--------------------|
| <b>Gene Set Name</b>                                     | <b>Genes in Overlap</b> | <b>p-value</b> | <b>FDR q-value</b> |
| GO IMMUNE RESPONSE                                       | 55                      | 6.75E-74       | 1.20E-69           |
| GO DEFENSE RESPONSE                                      | 54                      | 3.98E-69       | 3.55E-65           |
| GO IMMUNE SYSTEM PROCESS                                 | 59                      | 2.67E-67       | 1.58E-63           |
| REACTOME IMMUNE SYSTEM                                   | 41                      | 4.67E-50       | 2.08E-46           |
| GO REGULATION OF IMMUNE SYSTEM PROCESS                   | 45                      | 1.75E-49       | 6.23E-46           |
| GO RESPONSE TO BIOTIC STIMULUS                           | 39                      | 2.29E-47       | 6.79E-44           |
| GO RESPONSE TO EXTERNAL STIMULUS                         | 46                      | 4.87E-46       | 1.24E-42           |
| GO INNATE IMMUNE RESPONSE                                | 35                      | 6.60E-46       | 1.47E-42           |
| GO POSITIVE REGULATION OF IMMUNE SYSTEM PROCESS          | 35                      | 9.47E-41       | 1.87E-37           |
| GO REGULATION OF CYTOKINE PRODUCTION                     | 30                      | 3.48E-38       | 6.20E-35           |

Supplemental Figure 1. Selection of tumor-rich, immune cell-rich, and stroma-rich regions within PDAC tumors.

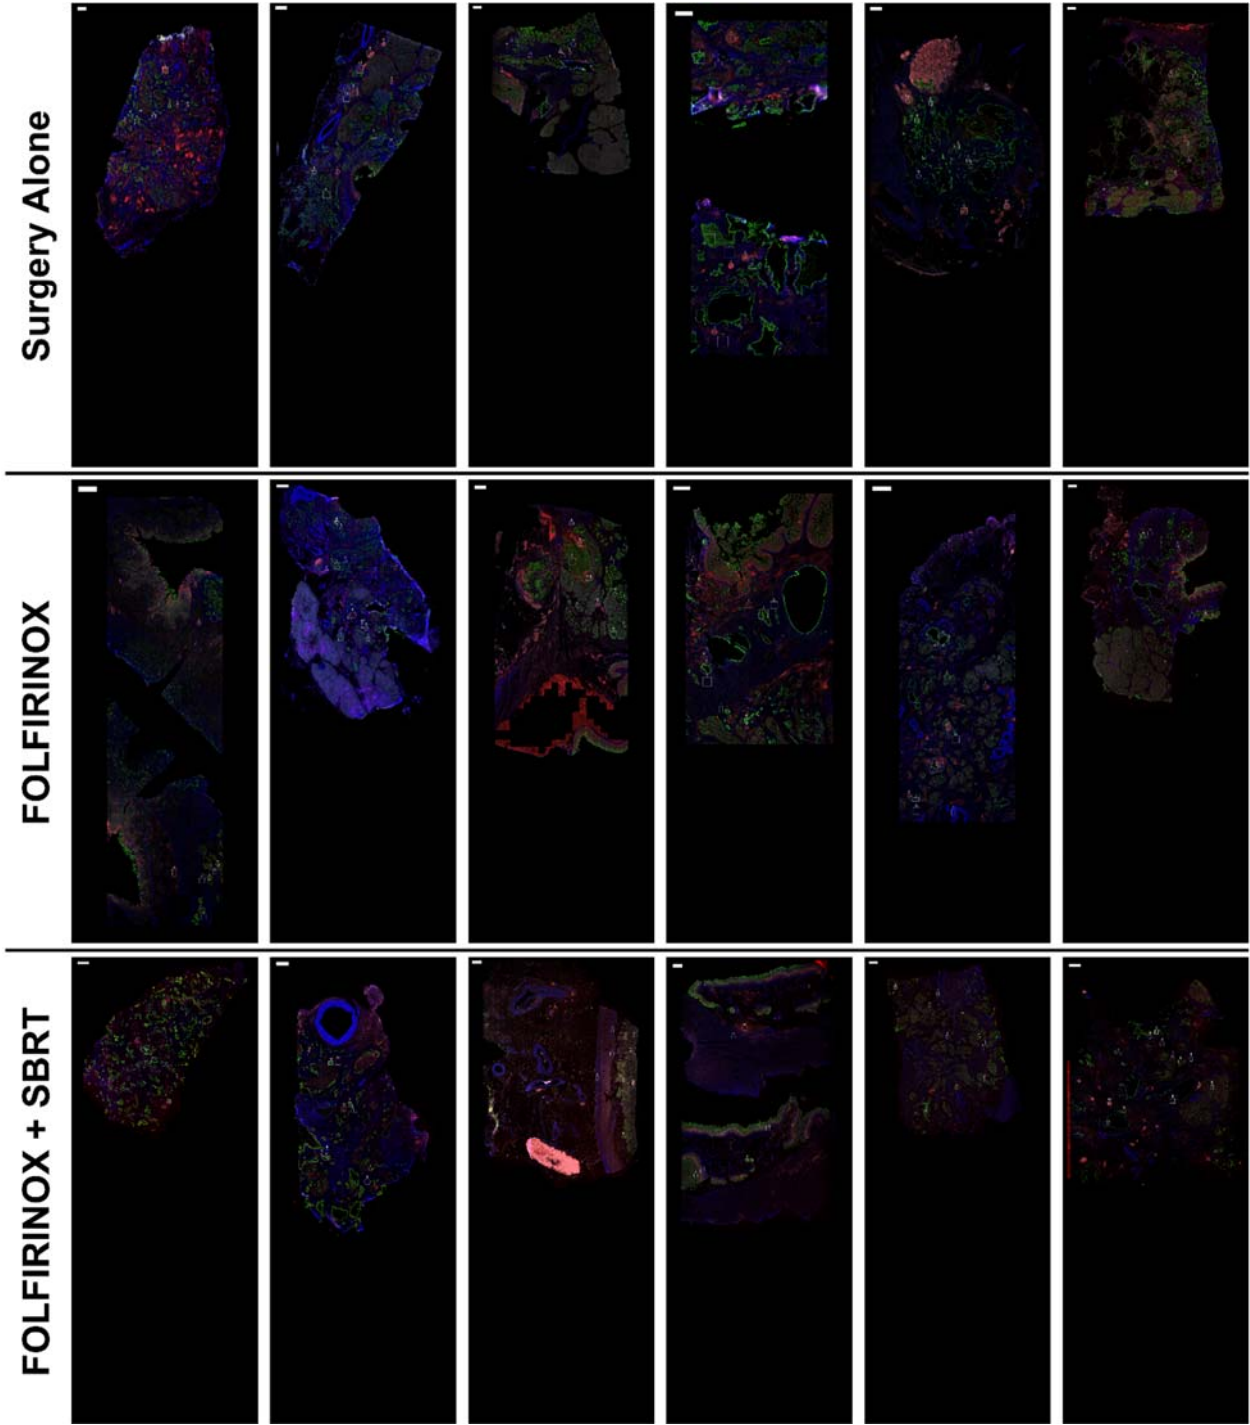

Supplemental Figure 2. Networks of up and down regulated genes: F+SBRT vs. Surgery-alone

a)

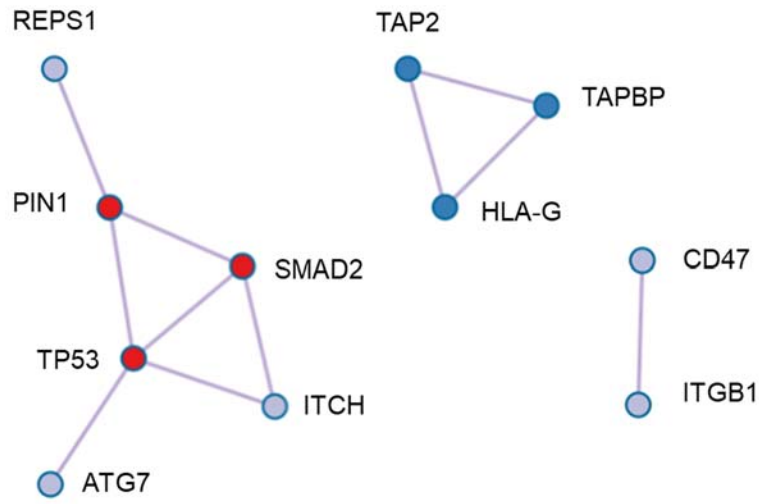

b)

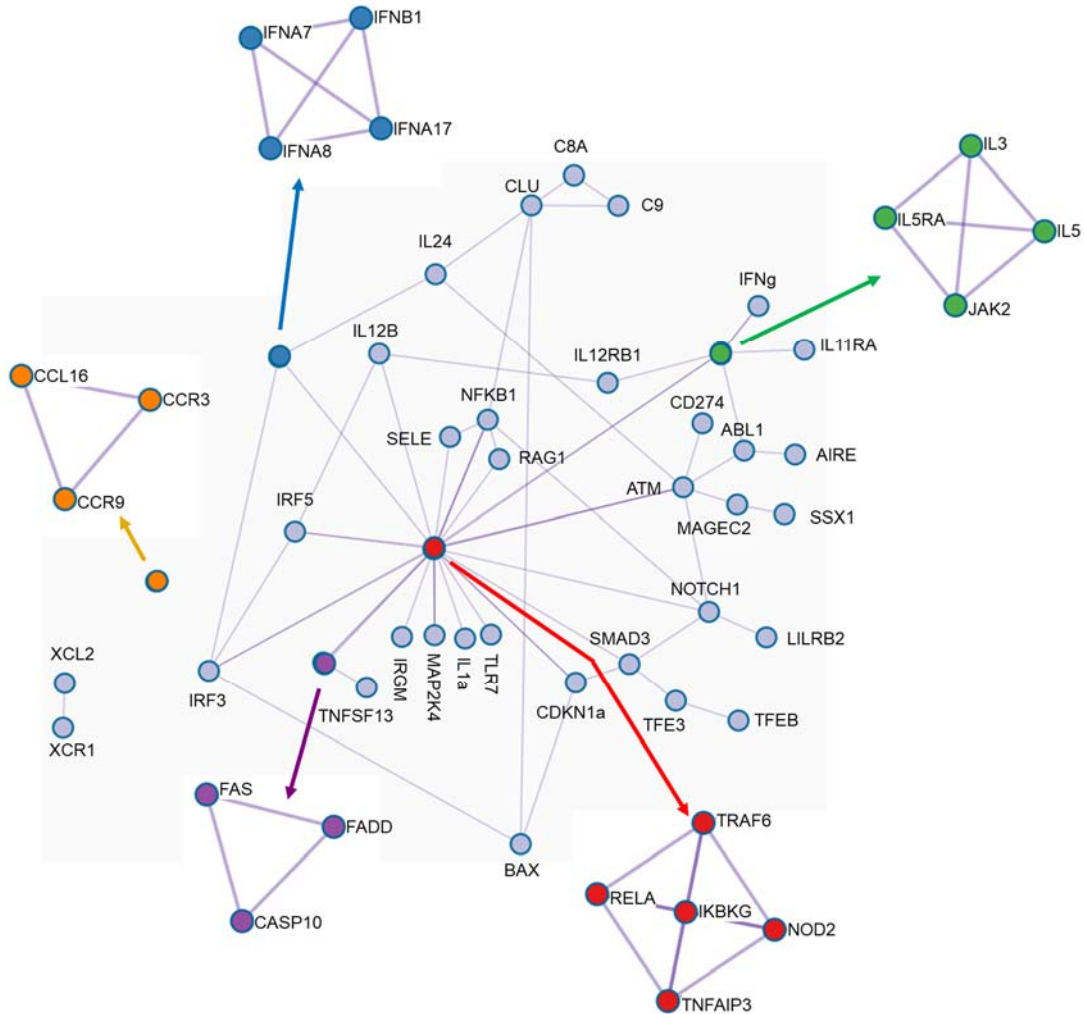

Supplemental Figure 3. Networks of up and down regulated genes: F+XRT vs. Surgery-alone

a)

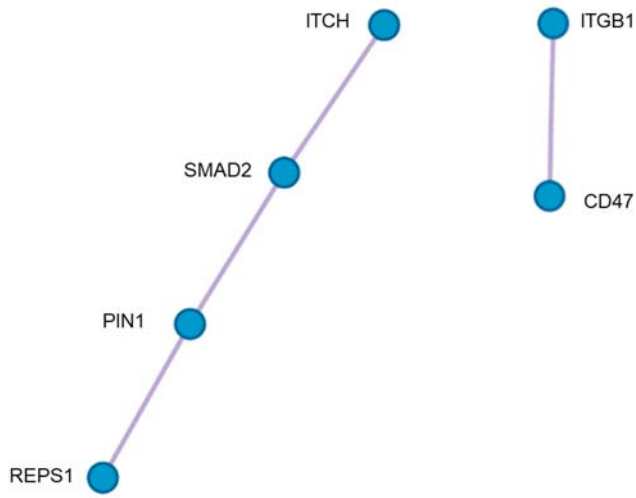

b)

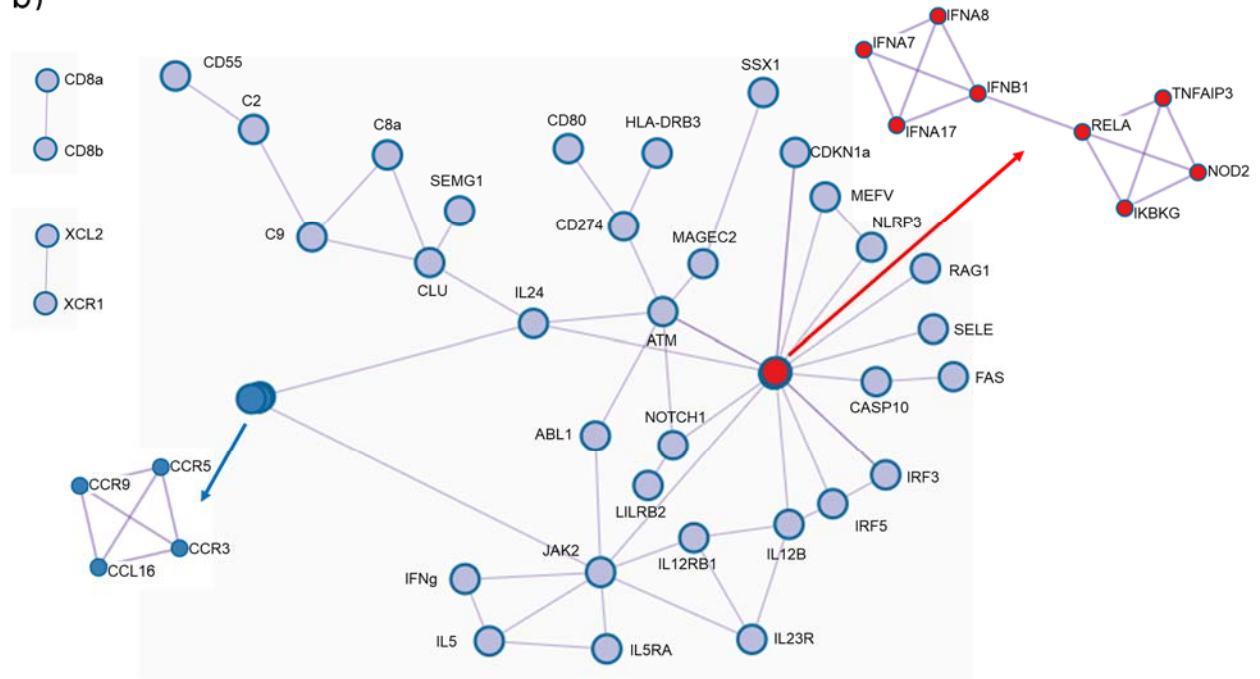

Supplemental Figure 4. Networks of up and down regulated genes: F+SBRT vs. FOLFIRINOX

a)

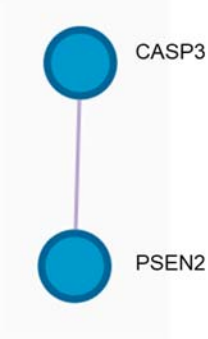

b)

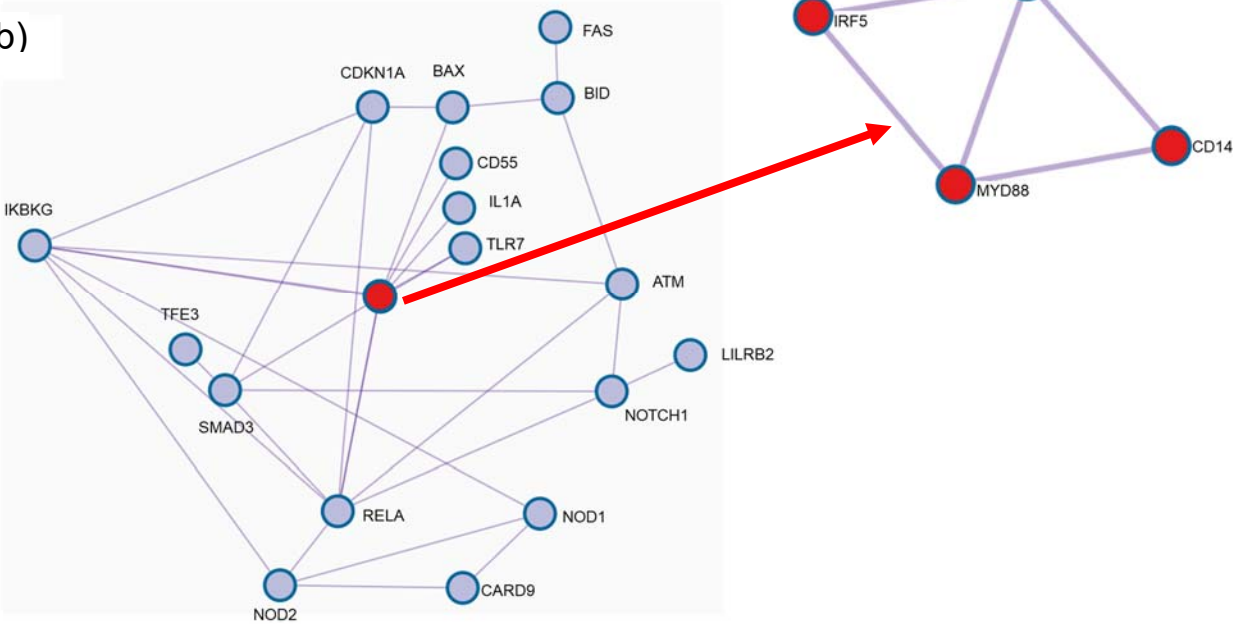

Supplemental Figure 5. Networks of up and down regulated genes: F+XRT vs. FOLFIRINOX

a)

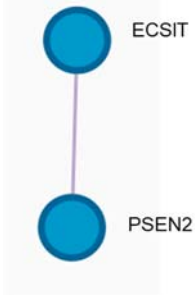

b)

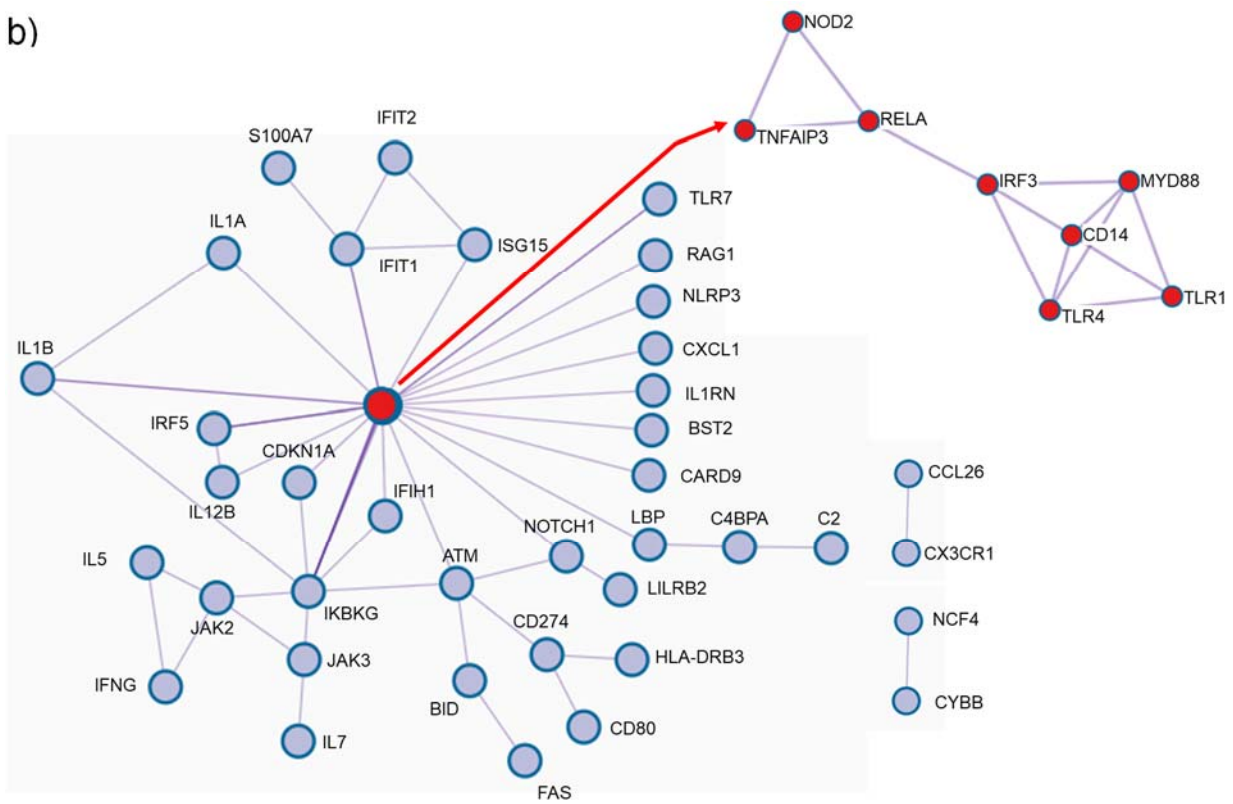

Supplemental table 4. Transcription factor target motifs enriched within gene sets altered by FOLFIRINOX + SBRT compared to surgery alone.

| <b>F+SBRT vs. surgery-alone</b>      |                             |                                              |                             |
|--------------------------------------|-----------------------------|----------------------------------------------|-----------------------------|
| <b>Enriched in upregulated genes</b> |                             | <b>Enriched in upregulated genes (cont.)</b> |                             |
| <b>Transcription Factor</b>          | <b>FDR-adjusted p-value</b> | <b>Transcription Factor</b>                  | <b>FDR-adjusted p-value</b> |
| <i>KLF13</i>                         | <i>0.000123</i>             | <i>SNAI2</i>                                 | <i>0.016068</i>             |
| <i>LEF1</i>                          | <i>0.000123</i>             | <i>TCF3</i>                                  | <i>0.016068</i>             |
| <i>SNF1</i>                          | <i>0.000952</i>             | <i>TP53</i>                                  | <i>0.016243</i>             |
| <i>SRF</i>                           | <i>0.000952</i>             | <i>RUNX2</i>                                 | <i>0.017725</i>             |
| <i>POU2F1</i>                        | <i>0.00145</i>              | <i>ZFHX3</i>                                 | <i>0.022552</i>             |
| <i>NR5A2</i>                         | <i>0.001511</i>             | <i>USF2</i>                                  | <i>0.024764</i>             |
| <i>TCF4</i>                          | <i>0.003412</i>             | <i>ZBTB7A</i>                                | <i>0.026002</i>             |
| <i>POU2F2</i>                        | <i>0.004727</i>             | <i>HNF4A</i>                                 | <i>0.032677</i>             |
| <i>RUNX1</i>                         | <i>0.007633</i>             | <i>FOXO3A</i>                                | <i>0.038192</i>             |
| <i>SAMD9L</i>                        | <i>0.008882</i>             | <i>FOXA1</i>                                 | <i>0.038192</i>             |
| <i>JUN</i>                           | <i>0.008882</i>             | <i>PRDM1</i>                                 | <i>0.038192</i>             |
| <i>YY1</i>                           | <i>0.008951</i>             | <i>RELB</i>                                  | <i>0.038192</i>             |
| <i>CEBPD</i>                         | <i>0.012103</i>             | <i>RELA</i>                                  | <i>0.038310</i>             |
| <i>MIB2</i>                          | <i>0.012103</i>             | <i>FOXJ1</i>                                 | <i>0.038919</i>             |
| <i>NFKB1</i>                         | <i>0.122820</i>             | <i>ATF2</i>                                  | <i>0.045132</i>             |
| <i>POU1F1</i>                        | <i>0.016068</i>             | <i>FOXF1</i>                                 | <i>0.046137</i>             |
| <i>NFIA</i>                          | <i>0.016068</i>             | <i>SMARCA2</i>                               | <i>0.047039</i>             |
| <i>SNAI1</i>                         | <i>0.016068</i>             |                                              |                             |

| <b>Enriched in downregulated genes</b> |                             |
|----------------------------------------|-----------------------------|
| <b>Transcription Factor</b>            | <b>FDR-adjusted p-value</b> |
| <i>SRF</i>                             | <i>0.003532</i>             |

Supplemental table 5. Transcription factor target motifs enriched within gene sets altered by FOLFIRINOX + XRT compared to surgery alone.

| <b>F+XRT vs. surgery-alone</b>       |                             |                                              |                             |
|--------------------------------------|-----------------------------|----------------------------------------------|-----------------------------|
| <b>Enriched in upregulated genes</b> |                             | <b>Enriched in upregulated genes (cont.)</b> |                             |
| <b>Transcription Factor</b>          | <b>FDR-adjusted p-value</b> | <b>Transcription Factor</b>                  | <b>FDR-adjusted p-value</b> |
| <i>LEF1</i>                          | <i>0.000006</i>             | <i>CRTC3</i>                                 | <i>0.020796</i>             |
| <i>TCF4</i>                          | <i>0.000204</i>             | <i>FOXJ1</i>                                 | <i>0.020796</i>             |
| <i>SRF</i>                           | <i>0.000351</i>             | <i>ZFHX3</i>                                 | <i>0.020796</i>             |
| <i>JUN</i>                           | <i>0.001511</i>             | <i>ETS1</i>                                  | <i>0.031622</i>             |
| <i>POU1F1</i>                        | <i>0.003149</i>             | <i>ELF3</i>                                  | <i>0.040872</i>             |
| <i>KLF13</i>                         | <i>0.003779</i>             | <i>HNF1A</i>                                 | <i>0.040872</i>             |
| <i>SND1</i>                          | <i>0.0037900</i>            | <i>GATA1</i>                                 | <i>0.040872</i>             |
| <i>POU2F1</i>                        | <i>0.005689</i>             | <i>CBEPB</i>                                 | <i>0.040872</i>             |
| <i>POU2F2</i>                        | <i>0.005689</i>             | <i>RUNX1</i>                                 | <i>0.040872</i>             |
| <i>SAMD9L</i>                        | <i>0.005779</i>             | <i>FOXF1</i>                                 | <i>0.045304</i>             |
| <i>YY1</i>                           | <i>0.007127</i>             | <i>GATA1</i>                                 | <i>0.045304</i>             |
| <i>NR5A2</i>                         | <i>0.011655</i>             | <i>IRF8</i>                                  | <i>0.048165</i>             |
| <i>RUNX2</i>                         | <i>0.019098</i>             | <i>HNF4A</i>                                 | <i>0.048731</i>             |

| <b>Enriched in downregulated genes</b> |                             |
|----------------------------------------|-----------------------------|
| <b>Transcription Factor</b>            | <b>FDR-adjusted p-value</b> |
| <i>None</i>                            | <i>n/a</i>                  |

Supplemental table 6. Transcription factor target motifs enriched within gene sets altered by FOLFIRINOX + SBRT compared to FOLFIRINOX alone.

| <b>F+SBRT vs. FOLFIRINOX</b>         |                             |
|--------------------------------------|-----------------------------|
| <b>Enriched in upregulated genes</b> |                             |
| <b>Transcription Factor</b>          | <b>FDR-adjusted p-value</b> |
| <i>RUNX1</i>                         | <i>0.000418</i>             |
| <i>SND1</i>                          | <i>0.003836</i>             |
| <i>NR3C1</i>                         | <i>0.022453</i>             |
| <i>TP53</i>                          | <i>0.022453</i>             |
| <i>LEF1</i>                          | <i>0.022453</i>             |
| <i>NFYA</i>                          | <i>0.026683</i>             |
| <i>KLF13</i>                         | <i>0.030524</i>             |
| <i>MAX</i>                           | <i>0.040325</i>             |
| <i>NR5A2</i>                         | <i>0.047903</i>             |

| <b>Enriched in downregulated genes</b> |                             |
|----------------------------------------|-----------------------------|
| <b>Transcription Factor</b>            | <b>FDR-adjusted p-value</b> |
| <i>None</i>                            | <i>n/a</i>                  |

Supplemental table 7. Transcription factor target motifs enriched within gene sets altered by FOLFIRINOX + XRT compared to FOLFIRINOX.

| <b>F+XRT vs. FOLFIRINOX</b>          |                             |
|--------------------------------------|-----------------------------|
| <b>Enriched in upregulated genes</b> |                             |
| <b>Transcription Factor</b>          | <b>FDR-adjusted p-value</b> |
| <i>SND1</i>                          | <i>0.013709</i>             |
| <i>JUN</i>                           | <i>0.013709</i>             |
| <i>RELA</i>                          | <i>0.015582</i>             |
| <i>RUNX1</i>                         | <i>0.015582</i>             |
| <i>REL</i>                           | <i>0.029124</i>             |
| <i>LTF</i>                           | <i>0.030045</i>             |
| <i>SPI1</i>                          | <i>0.030045</i>             |
| <i>POU1F1</i>                        | <i>0.030045</i>             |
| <i>TCF4</i>                          | <i>0.030045</i>             |
| <i>NFKB1</i>                         | <i>0.042192</i>             |
| <i>HIF1A</i>                         | <i>0.049391</i>             |
| <i>NR3C1</i>                         | <i>0.049391</i>             |
| <i>SREBF1</i>                        | <i>0.049391</i>             |
| <i>SRF</i>                           | <i>0.049391</i>             |

| <b>Enriched in downregulated genes</b> |                             |
|----------------------------------------|-----------------------------|
| <b>Transcription Factor</b>            | <b>FDR-adjusted p-value</b> |
| <i>None</i>                            | <i>n/a</i>                  |

**Supplemental Table 8.** Statistics describing protein expression.

| <b>Tumor-rich regions</b> | <b>Mean ± S.D. (counts)</b> |                   |               |
|---------------------------|-----------------------------|-------------------|---------------|
|                           | <b>Surgery-alone</b>        | <b>FOLFIRINOX</b> | <b>F+SBRT</b> |
| AKT                       | 11316 ± 5632                | 11443 ± 3743      | 7515 ± 3830   |
| B7-H3                     | 2949 ± 1925                 | 2774 ± 3116       | 2027 ± 1030   |
| BCL2                      | 466 ± 226                   | 937 ± 473         | 544 ± 253     |
| B-2-Microglobulin         | 18929 ± 13725               | 13142 ± 12483     | 13342 ± 12448 |
| B-Catenin                 | 74809 ± 48524               | 51511 ± 33442     | 38820 ± 29988 |
| CD3                       | 1610 ± 1669                 | 2248 ± 1900       | 928 ± 664     |
| CD4                       | 2032 ± 1585                 | 2045 ± 1132       | 1107 ± 712    |
| CD8A                      | 997 ± 902                   | 1381 ± 1463       | 904 ± 786     |
| CD14                      | 1303 ± 762                  | 2425 ± 4493       | 965 ± 906     |
| CD19                      | 269 ± 143                   | 297 ± 134         | 273 ± 171     |
| CD20                      | 389 ± 257                   | 486 ± 553         | 246 ± 118     |
| CD44                      | 2365 ± 1483                 | 5215 ± 5026       | 1342 ± 1311   |
| CD45                      | 796 ± 563                   | 1536 ± 1336       | 529 ± 332     |
| CD45RO                    | 584 ± 352                   | 969 ± 967         | 238 ± 145     |
| CD56                      | 959 ± 1052                  | 2832 ± 4251       | 753 ± 730     |
| CD68                      | 14134 ± 13181               | 9205 ± 10630      | 4705 ± 2336   |
| FOXP3                     | 177 ± 102                   | 169 ± 85          | 181 ± 98      |
| GZMB                      | 1454 ± 690                  | 1506 ± 839        | 1078 ± 429    |
| Ki-67                     | 3147 ± 3021                 | 1164 ± 1548       | 1252 ± 1145   |
| p-AKT                     | 562 ± 281                   | 596 ± 203         | 537 ± 262     |
| PD-1                      | 277 ± 134                   | 273 ± 141         | 298 ± 183     |
| PD-L1                     | 1538 ± 834                  | 1428 ± 712        | 1664 ± 1005   |
| PTEN                      | 530 ± 290                   | 712 ± 338         | 337 ± 131     |
| S6                        | 5634 ± 2157                 | 6596 ± 3113       | 6069 ± 2997   |
| STAT3                     | 8456 ± 5070                 | 8061 ± 2495       | 5559 ± 2280   |
| p-STAT3                   | 311 ± 163                   | 351 ± 157         | 330 ± 153     |
| VISTA                     | 1255 ± 630                  | 1161 ± 805        | 547 ± 424     |

Supplemental Table 8 (cont.)

| Immune-rich regions | Mean ± S.D. (counts) |               |              |
|---------------------|----------------------|---------------|--------------|
|                     | Surgery-alone        | FOLFIRINOX    | F+SBRT       |
| AKT                 | 6978 ± 3830          | 8499 ± 3730   | 5231 ± 4485  |
| B7-H3               | 1750 ± 1226          | 3389 ± 4429   | 2035 ± 1504  |
| BCL2                | 2924 ± 3631          | 1886 ± 930    | 927 ± 699    |
| B-2-Microglobulin   | 14896 ± 7126         | 15761 ± 10250 | 11004 ± 6065 |
| B-Catenin           | 9489 ± 7125          | 12220 ± 7837  | 6734 ± 11580 |
| CD3                 | 24767 ± 16522        | 19663 ± 14206 | 8940 ± 8058  |
| CD4                 | 15070 ± 9736         | 11286 ± 4901  | 6366 ± 5361  |
| CD8A                | 6012 ± 4493          | 7655 ± 7325   | 3506 ± 2296  |
| CD14                | 2433 ± 1300          | 4587 ± 4667   | 1453 ± 780   |
| CD19                | 2829 ± 3115          | 641 ± 582     | 502 ± 961    |
| CD20                | 32520 ± 31208        | 9572 ± 12645  | 6027 ± 10992 |
| CD44                | 8344 ± 5106          | 10422 ± 8389  | 3264 ± 2241  |
| CD45                | 19457 ± 13769        | 12728 ± 12770 | 4687 ± 4804  |
| CD45RO              | 4721 ± 2702          | 6037 ± 6359   | 1507 ± 1085  |
| CD56                | 2317 ± 2820          | 3039 ± 4002   | 1902 ± 2735  |
| CD68                | 10343 ± 10726        | 15110 ± 15091 | 6953 ± 6333  |
| FOXP3               | 187 ± 84             | 237 ± 160     | 129 ± 84     |
| GZMB                | 1184 ± 703           | 2065 ± 1572   | 787 ± 484    |
| Ki-67               | 2918 ± 3363          | 1763 ± 1751   | 3007 ± 8136  |
| p-AKT               | 355 ± 126            | 511 ± 252     | 343 ± 209    |
| PD-1                | 682 ± 443            | 708 ± 483     | 190 ± 113    |
| PD-L1               | 1262 ± 597           | 1927 ± 1281   | 1181 ± 651   |
| PTEN                | 482 ± 259            | 708 ± 416     | 253 ± 134    |
| S6                  | 3695 ± 1278          | 4809 ± 2269   | 3038 ± 1568  |
| STAT3               | 5918 ± 3555          | 6114 ± 2117   | 3418 ± 2476  |
| p-STAT3             | 223 ± 84             | 361 ± 209     | 238 ± 143    |
| VISTA               | 1940 ± 1211          | 2067 ± 1006   | 721 ± 842    |

Supplemental Table 8 (cont.)

| Stroma-rich regions | Mean $\pm$ S.D. (counts) |                   |                  |
|---------------------|--------------------------|-------------------|------------------|
|                     | Surgery-alone            | FOLFIRINOX        | F+SBRT           |
| AKT                 | 15106 $\pm$ 5700         | 17598 $\pm$ 10011 | 11345 $\pm$ 6251 |
| B7-H3               | 5728 $\pm$ 2956          | 4790 $\pm$ 4371   | 5189 $\pm$ 3207  |
| BCL2                | 1122 $\pm$ 559           | 1832 $\pm$ 960    | 630 $\pm$ 215    |
| B-2-Microglobulin   | 9662 $\pm$ 4885          | 9428 $\pm$ 5619   | 5944 $\pm$ 2403  |
| B-Catenin           | 24877 $\pm$ 12649        | 21421 $\pm$ 13465 | 11831 $\pm$ 5965 |
| CD3                 | 5753 $\pm$ 4479          | 3606 $\pm$ 3307   | 1066 $\pm$ 690   |
| CD4                 | 5963 $\pm$ 3661          | 3456 $\pm$ 1781   | 1716 $\pm$ 848   |
| CD8A                | 2357 $\pm$ 1895          | 1886 $\pm$ 2125   | 792 $\pm$ 661    |
| CD14                | 4437 $\pm$ 2332          | 5410 $\pm$ 4756   | 2285 $\pm$ 133   |
| CD19                | 468 $\pm$ 327            | 481 $\pm$ 302     | 177 $\pm$ 52     |
| CD20                | 1344 $\pm$ 1390          | 1080 $\pm$ 1725   | 338 $\pm$ 293    |
| CD44                | 4358 $\pm$ 2513          | 5954 $\pm$ 4515   | 1249 $\pm$ 967   |
| CD45                | 1937 $\pm$ 1235          | 2054 $\pm$ 2113   | 488 $\pm$ 350    |
| CD45RO              | 1406 $\pm$ 967           | 1239 $\pm$ 1051   | 285 $\pm$ 152    |
| CD56                | 4343 $\pm$ 6227          | 5953 $\pm$ 6873   | 2592 $\pm$ 3756  |
| CD68                | 12771 $\pm$ 6636         | 9282 $\pm$ 9390   | 4799 $\pm$ 2665  |
| FOXP3               | 243 $\pm$ 183            | 293 $\pm$ 221     | 106 $\pm$ 39     |
| GZMB                | 4088 $\pm$ 3495          | 3758 $\pm$ 3492   | 1458 $\pm$ 624   |
| Ki-67               | 1631 $\pm$ 1312          | 576 $\pm$ 480     | 396 $\pm$ 523    |
| p-AKT               | 828 $\pm$ 482            | 1102 $\pm$ 684    | 638 $\pm$ 261    |
| PD-1                | 404 $\pm$ 235            | 469 $\pm$ 321     | 194 $\pm$ 62     |
| PD-L1               | 2241 $\pm$ 1569          | 3002 $\pm$ 1809   | 1569 $\pm$ 632   |
| PTEN                | 1126 $\pm$ 609           | 1171 $\pm$ 526    | 567 $\pm$ 188    |
| S6                  | 5039 $\pm$ 1498          | 6708 $\pm$ 3768   | 4601 $\pm$ 1232  |
| STAT3               | 9294 $\pm$ 5156          | 10478 $\pm$ 5920  | 5929 $\pm$ 2929  |
| p-STAT3             | 322 $\pm$ 213            | 476 $\pm$ 256     | 338 $\pm$ 154    |
| VISTA               | 2881 $\pm$ 1879          | 1744 $\pm$ 869    | 663 $\pm$ 442    |
